# Supplementary material for: In Vitro evaluation of the anti-pancreatic cancer activity of epimedium herb
Source: Front Pharmacol. 2024 Jul 1;15:1389221. doi: 10.3389/fphar.2024.1389221 (PMC11246921; doi:10.3389/fphar.2024.1389221)
Supplement: Supplementary file 1 [file Table1.xlsx]

## Sheet: Sheet1
Supplementary Table S1 Acquisition results of candidate active ingredients in Epimedium and their targets
Drug Name	Common Name of Target	Uniprot ID	source
Hyperoside	NOS2	P35228	TCMSP
Hyperoside	PDE5A	O76074	ETCM
Hyperoside	PTGS2	P35354	TCMSP
Hyperoside	TERT	O14746	SwissTargetPrediction
Hyperoside	PLAU	P00749	ETCM
Hyperoside	PTPN1	PTPN1	ETCM
Hyperoside	TOP2A	P11388	TCMSP
Hyperoside	HSP90AA1	P07900	TCMSP
Hyperoside	TOP2A	P11388	TCMSP
Hyperoside	CA7	P43166	SwissTargetPrediction
Hyperoside	PTPN1	P18031	ETCM
Hyperoside	XDH	P47989	SwissTargetPrediction
Hyperoside	RPS6KA3	P51812	SwissTargetPrediction
Hyperoside	ACHE	P22303	SwissTargetPrediction
Hyperoside	AKR1B1	P15121	SwissTargetPrediction
Hyperoside	PTGS1	P23219	TCMSP
Hyperoside	ADRA2C	P18825	SwissTargetPrediction
Hyperoside	CA2	P00918	SwissTargetPrediction
Hyperoside	SP4	Q02446	CTD
Hyperoside	SULT2A1	Q06520	CTD
Hyperoside	PDE5A	O76074	ETCM
Hyperoside	RPS6KA3	P51812	ETCM
Hyperoside	NQO2	P16083	SwissTargetPrediction
Hyperoside	CA12	O43570	ETCM
Hyperoside	ACHE	P22303	ETCM
Hyperoside	TNF	P01375	SwissTargetPrediction
Hyperoside	CA1	P00915	ETCM
Hyperoside	CA2	P00918	ETCM
Hyperoside	MMP9	P14780	ETCM
Hyperoside	CA4	P22748	SwissTargetPrediction
Hyperoside	CA12	O43570	SwissTargetPrediction
Hyperoside	CA4	P22748	ETCM
Hyperoside	CA7	P43166	ETCM
Hyperoside	BIRC5	O15392	CTD
Hyperoside	TNF	P01375	CTD
Hyperoside	PDE5A	O76074	SwissTargetPrediction
Hyperoside	PARP1	P09874	CTD
Hyperoside	UGT1A1	P22309	CTD
Hyperoside	ACHE	P22303	CTD
Hyperoside	ADRA2A	P08913	SwissTargetPrediction
Hyperoside	MAPK3	P27361	CTD
Hyperoside	ALOX5	P09917	SwissTargetPrediction
Hyperoside	ESR1	P03372	CTD
Hyperoside	UGT1A6	P19224	CTD
Hyperoside	MAPK1	P28482	CTD
Hyperoside	PRSS1	P07477	TCMSP
Hyperoside	CYP2E1	P05181	CTD
Hyperoside	SLC2A2	P11168	CTD
Hyperoside	CAT	P04040	CTD
Hyperoside	GLI1	P08151	CTD
Hyperoside	BCL2	P10415	CTD
Hyperoside	SP1	P08047	CTD
Hyperoside	ADORA1	P30542	SwissTargetPrediction
Hyperoside	IL2	P60568	SwissTargetPrediction
Hyperoside	CD38	P28907	SwissTargetPrediction
Hyperoside	NOX4	Q9NPH5	SwissTargetPrediction
Hyperoside	NMUR2	Q9GZQ4	SwissTargetPrediction
Hyperoside	NCOA2	Q15596	TCMSP
Hyperoside	PTPN1	P18031	TCMSP
Hyperoside	XDH	P47989	ETCM
Hyperoside	VCAM1	P19320	CTD
Hyperoside	TNFRSF1A	P19438	CTD
Hyperoside	GPT	P24298	CTD
Hyperoside	NFKBIA	P25963	CTD
Hyperoside	CASP3	P42574	CTD
Hyperoside	SULT1A1	P50225	CTD
Hyperoside	CYCS	P99999	CTD
Hyperoside	SP3	Q02447	CTD
Hyperoside	BAX	Q07812	CTD
Hyperoside	SHH	Q15465	CTD
Hyperoside	NFE2L2	Q16236	CTD
Hyperoside	PDCD4	Q53EL6	CTD
Hyperoside	CAT	Q6IB77	CTD
Hyperoside	PRIMA1	Q86XR5	CTD
Hyperoside	SP1	Q8N907	CTD
Hyperoside	ZBTB10	Q96DT7	CTD
Hyperoside	SIRT1	Q96EB6	CTD
Hyperoside	SMO	Q99835	CTD
Hyperoside	UGT1A10	Q9HAW8	CTD
Hyperoside	SMO	Q9NWM0	CTD
Epimedin A	PDE5A	O76074	ETCM
Epimedin A	PLAU	P00749	ETCM
Epimedin B	ADRA1B	P35368	TCMSP
Epimedin B	AR	P10275	TCMSP
Epimedin B	ADRB2	P07550	TCMSP
Epimedin B	KCNMA1	Q12791	TCMSP
Epimedin B	CALM2	P0DP24	TCMSP
Epimedin B	CDK2	P24941	TCMSP
Epimedin B	PDE5A	O76074	ETCM
Epimedin B	F7	P08709	TCMSP
Epimedin B	DPP4	P27487	TCMSP
Epimedin B	ESR1	P03372	TCMSP
Hyperoside	PTGS2	P35354	SwissTargetPrediction
Hyperoside	SLC29A1	Q99808	SwissTargetPrediction
Hyperoside	SLC5A1	P13866	CTD
Hyperoside	RELA	Q04206	CTD
Epimedin B	HSP90AA1	P07900	TCMSP
Epimedin B	IGHG1	P01857	TCMSP
Epimedin B	NOS3	P29474	TCMSP
Epimedin B	NCOA2	Q15596	TCMSP
Epimedin B	PPARG	P37231	TCMSP
Epimedin B	PDE5A	O76074	ETCM
Epimedin B	PDE5A	O76074	ETCM
Epimedin B	KCNH2	Q12809	TCMSP
Epimedin B	PTGS1	P23219	TCMSP
Epimedin B	PTGS2	P35354	TCMSP
Epimedin B	PIM1	P11309	TCMSP
Epimedin B	RXRA	P19793	TCMSP
Epimedin B	SCN5A	Q14524	TCMSP
Epimedin B	F2R	P25116	TCMSP
Epimedin B	PRSS1	P07477	TCMSP
Epimedin B	PLAU	P00749	ETCM
Epimedin B	KDR	P35968	TCMSP
Epimedin C	AHR	P35869	ETCM
Epimedin C	AKR1C3	P42330	ETCM
Epimedin C	ALDH2	P05091	ETCM
Epimedin C	AURKB	Q96GD4	ETCM
Epimedin C	CBR1	P16152	ETCM
Icariin	ACHE	P22303	ETCM
Icariin	AURKB	Q96GD4	ETCM
Icariin	CA12	O43570	CTD
Icariin	CA2	P00918	ETCM
Icariin	CA4	P22748	ETCM
Icariin	CA7	P43166	CTD
Icariin	PDE5A	O76074	CTD
Icariin	TOP2A	P11388	ETCM
Icariin	PDE5A	O76074	CTD
Icariin	PTPN1	P18031	ETCM
Icariin	TNF	P01375	TCMSP
Icariin	HSPA5	P11021	ETCM
Icariin	TH	P07101	ETCM
Icariin	CREB1	P16220	ETCM
Icariin	CASP1	P29466	ETCM
Icariin	BCL2L11	O43521	CTD
Icariin	TFF1	P04155	CTD
Icariin	APP	P05067	CTD
Icariin	BCL2	P10415	CTD
Icariin	EGFR	P00533	CTD
Icariin	SOD2	P04179	CTD
Icariin	IGF1	P05019	CTD
Icariin	ADRB1	P08588	CTD
Icariin	IL6	P05231	CTD
Icariin	MYL2	P10916	CTD
Icariin	PGR	P06401	CTD
Icariin	TIMP1	P01033	CTD
Icariin	TNFRSF11B	O00300	CTD
Icariin	JUN	P05412	CTD
Icariin	SPP1	P10451	CTD
Icariin	IL1B	P01584	CTD
Icariin	SLCO2B1	O94956	CTD
Icariin	NOS1	P29475	CTD
Icariin	MAPK1	P28482	CTD
Icariin	FOS	P01100	CTD
Icariin	MTOR	P42345	CTD
Icariin	TGFB1	P01137	CTD
Icariin	NOS3	P29474	CTD
Icariin	SLC17A7	Q9P2U7	CTD
Icariin	NFE2L1	Q14494	CTD
Icariin	SMAD6	O43541	CTD
Icariin	NOS2	P35228	CTD
Icariin	BGLAP	P02818	CTD
Icariin	HSD3B1	P14060	CTD
Icariin	MUC5AC	P98088	CTD
Icariin	TNFSF11	O14788	CTD
Icariin	FOXO3	O43524	CTD
Icariin	BACE1	P56817	CTD
Icariin	NFKBIA	P25963	CTD
Icariin	MAPK3	P27361	CTD
Icariin	PDE5A	O76074	CTD
Icariin	SHC1	P29353	CTD
Icariin	ID1	P41134	CTD
Icariin	NOS2	P60321	CTD
Icariin	RELA	Q04206	CTD
Icariin	MEF2C	Q06413	CTD
Icariin	PPARA	Q07869	CTD
Icariin	NR5A1	Q13285	CTD
Icariin	SMAD4	Q13485	CTD
Icariin	RUNX2	Q13950	CTD
Icariin	CARTPT	Q16568	CTD
Icariin	NOS1	Q8WY41	CTD
Icariin	SIRT1	Q96EB6	CTD
Icariin	NLRP3	Q96P20	CTD
Icariin	P2RX7	Q99572	CTD
Icariin	SPP1	Q9BX95	CTD
Icariin	MUC5B	Q9HC84	CTD
Icariin	SIRT3	Q9NTG7	CTD
Icariin	PPARGC1A	Q9UBK2	CTD
Icariin	CYP11A1	P05108	CTD
Icariin	BMP2	P12643	CTD
Icariin	BMP4	P12644	CTD
Icariin	MMP9	P14780	CTD
Icariin	MYH6	P13533	CTD
Icariin	GATA4	P43694	CTD
Icariin	PTGS2	P35354	CTD
Icariin	SLCO1B3	Q9NPD5	CTD
Icariin	AKT1	P31749	CTD
Icariin	NOS3	P60323	CTD
Icariin	NKX2-5	P52952	CTD
Icariin	SRC	P12931	CTD
Icariin	NOG	Q13253	CTD
Baohuoside I	ACHE	P22303	ETCM
Baohuoside I	AR	P10275	TCMSP
Baohuoside I	AURKB	Q96GD4	ETCM
Baohuoside I	CALM2	P0DP24	TCMSP
Baohuoside I	CA1	P00915	ETCM
Baohuoside I	CA12	O43570	ETCM
Baohuoside I	CA2	P00918	ETCM
Baohuoside I	CA4	P22748	ETCM
Baohuoside I	CA7	P43166	ETCM
Baohuoside I	CDK2	P24941	TCMSP
Baohuoside I	PDE5A	O76074	ETCM
Baohuoside I	F7	P08709	TCMSP
Baohuoside I	F10	P00742	TCMSP
Baohuoside I	CCNA2	P20248	TCMSP
Baohuoside I	DPP4	P27487	TCMSP
Baohuoside I	TOP2A	P11388	TCMSP
Baohuoside I	ESR1	P03372	TCMSP
Baohuoside I	GSK3B	P49841	TCMSP
Baohuoside I	HSP90AA1	P07900	TCMSP
Baohuoside I	MMP9	P14780	ETCM
Baohuoside I	MAPK14	Q16539	TCMSP
Baohuoside I	NOS2	P35228	TCMSP
Baohuoside I	NCOA2	Q15596	TCMSP
Baohuoside I	PPARG	P37231	TCMSP
Baohuoside I	PDE5A	O76074	ETCM
Baohuoside I	PTGS2	P35354	TCMSP
Baohuoside I	PTPN1	P18031	ETCM
Baohuoside I	F2	P00734	TCMSP
Baohuoside I	PIM1	P11309	TCMSP
Baohuoside I	PRSS1	P07477	TCMSP
Baohuoside I	PTPN1	P18031	ETCM
Baohuoside I	PLAU	P00749	ETCM
Baohuoside I	KDR	P35968	TCMSP
Baohuoside I	BRAF	P15056	CTD
Baohuoside I	VEGFA	P15692	CTD
Baohuoside I	COL1A2	P08123	CTD
Baohuoside I	AKT1	P31749	CTD
Baohuoside I	NOS2	P60321	CTD
Baohuoside I	CASP9	P55211	CTD
Baohuoside I	PDPK1	O15530	CTD
Baohuoside I	SLC10A1	Q14973	CTD
Baohuoside I	ABCB11	O95342	CTD
Baohuoside I	GOT1	P17174	CTD
Baohuoside I	CASP3	P42574	CTD
Baohuoside I	NR0B2	Q15466	CTD
Baohuoside I	PARP1	P09874	CTD
Baohuoside I	GPT	P24298	CTD
Baohuoside I	PTGS2	P35354	CTD
Baohuoside I	CYP7A1	P22680	CTD
Baohuoside I	MAPK1	P28482	CTD
Baohuoside I	NOS2	P35228	CTD
Baohuoside I	MAPK3	P27361	CTD
Baohuoside I	TNFSF11	O14788	CTD
Baohuoside I	BGLAP	P02818	CTD
Baohuoside I	ESR1	P03372	CTD
Baohuoside I	BCL2	P10415	CTD
Baohuoside I	TNFRSF11B	O00300	CTD
Baohuoside I	MKI67	P46013	CTD
Baohuoside I	GSK3B	P49841	CTD
Baohuoside I	BAX	Q07812	CTD
Baohuoside I	CASP8	Q14790	CTD
Baohuoside I	ABCC2	Q92887	CTD
Baohuoside I	AKT1S1	Q96B36	CTD
Baohuoside I	NR1H4	Q96RI1	CTD
Baohuoside I	EGF	P01133	CTD
Baohuoside I	EGFR	P00533	CTD
Baohuoside I	MTOR	P42345	CTD
Baohuoside I	ALPL	P05186	CTD
